# Supplementary material for: Interaction effect of obesity and thyroid autoimmunity on the prevalence of hyperthyrotropinaemia
Source: Springer Nature journal article supplement (doi:10.1007/s12020-020-02236-1), 2020-03-25
Supplement: MOESM2 [file 17832130]

|  | B | S.E. | OR(95%CI) | *P* value |
| --- | --- | --- | --- | --- |
| ***TPOAb(-) and TgAb(-)*** |  |  |  |  |
| Univariate model | 0.001 | 0.009 | 1.001(0.984-1.019) | 0.887 |
| Multivariate model | 0.016 | 0.012 | 1.016(0.992-1.039) | 0.187 |
| ***TPOAb(+) or TgAb(+)*** |  |  |  |  |
| Univariate model | 0.065 | 0.017 | 1.067(1.032-1.103) | <0.001 |
| Multivariate model | 0.063 | 0.023 | 1.065(1.019-1.113) | 0.005 |
| ***TPOAb(+) and TgAb(+)*** |  |  |  |  |
| Univariate model | 0.073 | 0.022 | 1.076(1.030-1.124) | 0.001 |
| Multivariate model | 0.047 | 0.032 | 1.048(0.984-1.116) | 0.147 |

**Supplementary Table 2** Multivariate logistic regression among different thyroid autoantibody groups

Dependent variable: hyperthyrotropinaemia; independent variable: BMI (continuous variable); Data are coefficient (B), standard error (S.E.), odds ratio (OR), 95% confidence interval (CI) and significance (*P* value). Multivariate model: adjusted for age, sex, smoking, drinking, exercising, hypertension, factor1 (responsible for FT3 and FT4), factor2 (responsible for TG and FPG) and factor3 (responsible for LDL-C). Abbreviations: BMI, body mass index; FT3, free triiodothyronine; FT4, free thyroxin; TPOAb, thyroid peroxidase antibody; TgAb, thyroglobulin antibody; TG, triglyceride; LDL-C, low-density lipoprotein cholesterol; FPG, fasting plasma glucose.
